# Supplementary material for: Comprehensive analysis of novel grafted polyethylenes using multidimensional fractionation methods
Source: Royal Society of Chemistry journal article supplement (doi:10.1039/c8py01122b), 2018-01-01
Supplement: c8py01122b1.pdf [file c8py01122b1.pdf]

## Supporting Information

### Comprehensive Analysis of Novel Grafted Polyethylenes Using Multidimensional Fractionation Methods

Paul S. Eselem Bungu <sup>a</sup>, Kristina Pflug <sup>b</sup>, Markus Busch <sup>b</sup> and Harald Pasch <sup>\*a</sup>

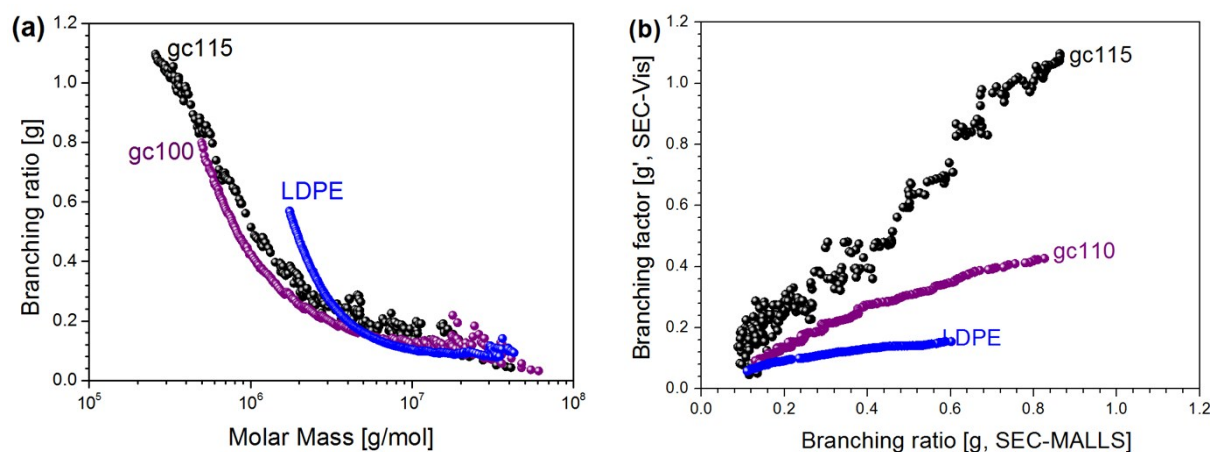

Figure S 1: plots showing in (a) the relationship between branching ratio (g) as a function of molar mass as determined by SEC-MALLS and (b) the relationship between g (calculated from ) and g' (calculated from ).
